CORRECTION

## Correction: Canadian natural science graduate stipends lie below the poverty line

Andrew J. Fraass, Thomas J. Bailey, Kayona Karunakumar, Andrea E. Wishart

The affiliation for the third author is incorrect. The correct affiliation is not indicated. Kayona Karunakumar is not affiliated with #4 but with: Support Our Science, Ottawa, ON, Canada.

### Reference

1. Fraass AJ, Bailey TJ, Karunakumar K, Wishart AE. Canadian natural science graduate stipends lie below the poverty line. PLoS One. 2025;20(5):e0313972. <https://doi.org/10.1371/journal.pone.0313972> PMID: [40402975](https://pubmed.ncbi.nlm.nih.gov/40402975/)

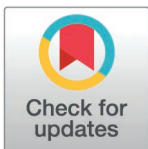

### OPEN ACCESS

**Citation:** Fraass AJ, Bailey TJ, Karunakumar K, Wishart AE (2025) Correction: Canadian natural science graduate stipends lie below the poverty line. PLoS One 20(9): e0331503. <https://doi.org/10.1371/journal.pone.0331503>

**Published:** September 3, 2025

**Copyright:** © 2025 Fraass et al. This is an open access article distributed under the terms of the [Creative Commons Attribution License](https://creativecommons.org/licenses/by/4.0/), which permits unrestricted use, distribution, and reproduction in any medium, provided the original author and source are credited.
